# Supplementary material
Source: Springer Nature journal article supplement (https://www.springermedizin.de/resource/supplementary/12943_2014_1376_MOESM7_ESM.pdf/9552842)

**A**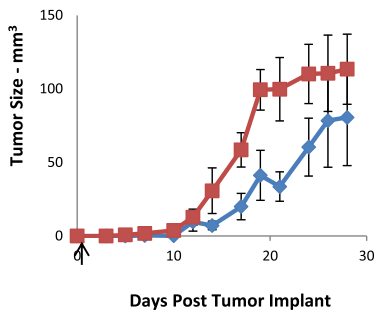**B**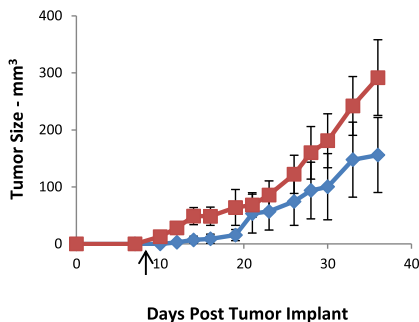**C****U251****U251 + EPC<sub>ac</sub>LDL**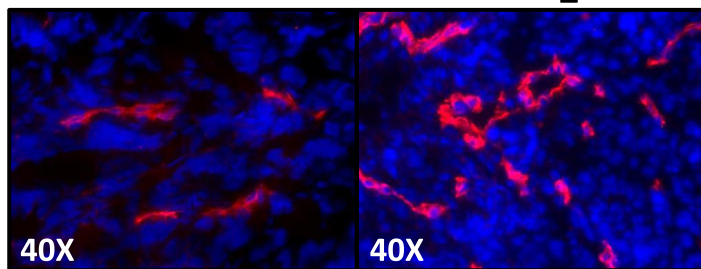**D****Mean Vessel Density: U251 Xenografts**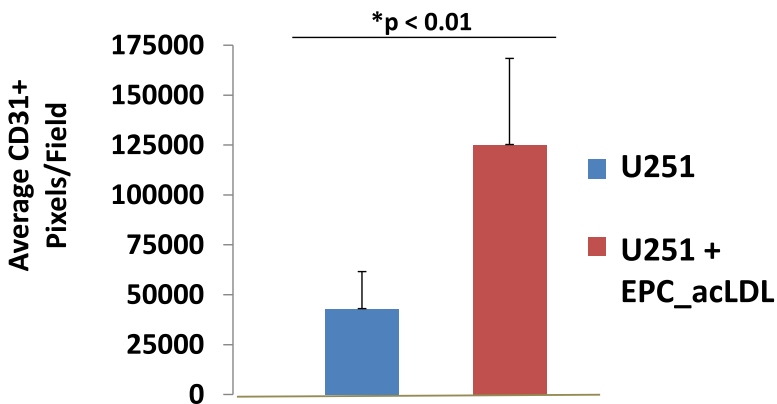

Supplement: MOESM7 [file 9552842]
